# Supplementary material for: Regional distribution of Christensenellaceae and its associations with metabolic syndrome based on a population-level analysis
Source: PeerJ. 2020 Aug 4;8:e9591. doi: 10.7717/peerj.9591 (PMC7413085; doi:10.7717/peerj.9591)
Supplement: Table S1 [file peerj-08-9591-s004.xlsx]

## Sheet: group_significance_level3
OTU	Test-Statistic	P	FDR_P	Bonferroni_P	Q1_mean	Q4_mean
Metabolism;Glycan Biosynthesis and Metabolism;Various types of N-glycan biosynthesis	948802	7.29e-258	2.39e-255	2.39e-255	4.03317	36.6375
Cellular Processes;Transport and Catabolism;Phagosome	1371294	1.06e-131	1.74e-129	3.48e-129	0.725875	26.1017
Cellular Processes;Cell Growth and Death;Cell cycle	1375271	7.07e-130	4.06e-128	2.32e-127	0.75392	26.1133
Environmental Information Processing;Signal Transduction;mTOR signaling pathway	1.37536e+06	7.42e-130	4.06e-128	2.43e-127	0.753619	26.1119
Human Diseases;Infectious Diseases;Hepatitis C	1.37536e+06	7.42e-130	4.06e-128	2.43e-127	0.753619	26.1119
Human Diseases;Infectious Diseases;Measles	1.37536e+06	7.42e-130	4.06e-128	2.43e-127	0.753619	26.1119
Genetic Information Processing;Translation;mRNA surveillance pathway	1.38443e+06	1.61e-129	7.54e-128	5.28e-127	1.62545	52.3031
Unclassified;Cellular Processes and Signaling;Cell division	1.40135e+06	1.21e-120	4.95e-119	3.96e-118	6858.51	5204.38
Unclassified;Cellular Processes and Signaling;Other ion-coupled transporters	1491807	1.14e-100	4.16e-99	3.74e-98	132900	99258.9
Metabolism;Carbohydrate Metabolism;Galactose metabolism	1.51744e+06	2.42e-95	7.94e-94	7.94e-93	67641.6	53638.5
Human Diseases;Infectious Diseases;Vibrio cholerae pathogenic cycle	1575946	9.85e-84	2.94e-82	3.23e-81	7321.74	5375.12
Human Diseases;Infectious Diseases;Vibrio cholerae infection	1586588	1.52e-82	4.15e-81	4.98e-80	2.9231	26.6867
Genetic Information Processing;Transcription;Basal transcription factors	1583147	1.99e-82	5.02e-81	6.52e-80	28.2446	122.931
Metabolism;Carbohydrate Metabolism;Pentose and glucuronate interconversions	1.62323e+06	6.53e-75	1.53e-73	2.14e-72	56455.1	42778.7
Metabolism;Energy Metabolism;Nitrogen metabolism	1.63456e+06	7.17e-73	1.57e-71	2.35e-70	67737.6	52970.6
Human Diseases;Neurodegenerative Diseases;Prion diseases	1.64135e+06	1.16e-71	2.37e-70	3.8e-69	953.631	482.561
Organismal Systems;Digestive System;Mineral absorption	1.66272e+06	6.32e-68	1.22e-66	2.07e-65	494.881	628.454
Metabolism;Biosynthesis of Other Secondary Metabolites;beta-Lactam resistance	1677347	1.99e-65	3.63e-64	6.54e-63	3253.32	2299.88
Human Diseases;Immune System Diseases;Primary immunodeficiency	1693377	9.61e-63	1.66e-61	3.15e-60	3953.24	3077.54
Human Diseases;Infectious Diseases;Pertussis	1.71588e+06	4.5e-59	7.37e-58	1.47e-56	7633.18	3794.38
Human Diseases;Metabolic Diseases;Type I diabetes mellitus	1717193	7.3e-59	1.14e-57	2.4e-56	4128.08	3679.2
Metabolism;Carbohydrate Metabolism;Glyoxylate and dicarboxylate metabolism	1745291	1.9e-54	2.83e-53	6.24e-52	54330.6	42190.6
Metabolism;Metabolism of Other Amino Acids;Glutathione metabolism	1750163	1.06e-53	1.52e-52	3.49e-51	23647.9	17435.7
Unclassified;Metabolism;Glycan biosynthesis and metabolism	1.75034e+06	1.13e-53	1.54e-52	3.71e-51	5542.68	3546.84
Human Diseases;Neurodegenerative Diseases;Amyotrophic lateral sclerosis (ALS)	1751385	1.63e-53	2.14e-52	5.36e-51	2248.5	1300.93
Metabolism;Metabolism of Terpenoids and Polyketides;Biosynthesis of siderophore group nonribosomal peptides	1753487	3.42e-53	4.31e-52	1.12e-50	6881.33	3697.83
Metabolism;Metabolism of Cofactors and Vitamins;Biotin metabolism	1.75503e+06	5.86e-53	7.12e-52	1.92e-50	13038.8	11052.7
Metabolism;Xenobiotics Biodegradation and Metabolism;Toluene degradation	1.75532e+06	6.49e-53	7.6e-52	2.13e-50	11053.9	7952.6
Cellular Processes;Transport and Catabolism;Peroxisome	1.76009e+06	3.42e-52	3.87e-51	1.12e-49	14655.5	12438
Unclassified;Metabolism;Carbohydrate metabolism	1.76029e+06	3.66e-52	4.01e-51	1.2e-49	16704.8	12835.5
Unclassified;Cellular Processes and Signaling;Membrane and intracellular structural molecules	1765290	2.06e-51	2.18e-50	6.76e-49	59712.3	46483.9
Metabolism;Metabolism of Other Amino Acids;Phosphonate and phosphinate metabolism	1.76716e+06	3.92e-51	4.02e-50	1.29e-48	6406.77	4833.86
Metabolism;Carbohydrate Metabolism;Ascorbate and aldarate metabolism	1768920	7.17e-51	7.13e-50	2.35e-48	19873.1	12300
Metabolism;Xenobiotics Biodegradation and Metabolism;Dioxin degradation	1770519	1.24e-50	1.2e-49	4.06e-48	7391.54	4549.58
Metabolism;Metabolism of Cofactors and Vitamins;Vitamin B6 metabolism	1772799	2.7e-50	2.53e-49	8.85e-48	17116.6	14269.1
Unclassified;Cellular Processes and Signaling;Pores ion channels	1.78553e+06	1.97e-48	1.8e-47	6.47e-46	42254.6	31752.7
Environmental Information Processing;Signaling Molecules and Interaction;Cellular antigens	1790559	1.05e-47	9.32e-47	3.45e-45	4689.56	3702.63
Metabolism;Metabolism of Cofactors and Vitamins;Porphyrin and chlorophyll metabolism	1803030	6.29e-46	5.43e-45	2.06e-43	78071.3	62066.2
Metabolism;Glycan Biosynthesis and Metabolism;Glycosyltransferases	1806121	1.71e-45	1.44e-44	5.62e-43	32688.3	26944.9
Unclassified;Cellular Processes and Signaling;Other transporters	1.80727e+06	2.48e-45	2.04e-44	8.15e-43	25658.8	20679.6
Human Diseases;Cancers;Bladder cancer	1.80899e+06	4.32e-45	3.46e-44	1.42e-42	560.13	264.059
Metabolism;Carbohydrate Metabolism;Starch and sucrose metabolism	1811683	1.03e-44	8.02e-44	3.37e-42	90332.5	73917.5
Unclassified;Metabolism;Amino acid metabolism	1.81307e+06	1.6e-44	1.22e-43	5.25e-42	24254.7	17375.9
Metabolism;Lipid Metabolism;Fatty acid elongation in mitochondria	1821460	4.84e-44	3.61e-43	1.59e-41	96.6695	244.484
Metabolism;Metabolism of Other Amino Acids;Cyanoamino acid metabolism	1819405	1.2e-43	8.75e-43	3.94e-41	25257.3	21050.4
Environmental Information Processing;Membrane Transport;Phosphotransferase system (PTS)	1819605	1.28e-43	9.12e-43	4.2e-41	72180.4	43099.2
Metabolism;Carbohydrate Metabolism;Fructose and mannose metabolism	1823474	4.33e-43	3.03e-42	1.42e-40	93049.5	73372.3
Human Diseases;Infectious Diseases;Amoebiasis	1824305	5.63e-43	3.85e-42	1.85e-40	563.537	710.711
Metabolism;Amino Acid Metabolism;Alanine, aspartate and glutamate metabolism	1.83546e+06	1.81e-41	1.21e-40	5.94e-39	85036.8	73496.1
Metabolism;Xenobiotics Biodegradation and Metabolism;Xylene degradation	1.83734e+06	3.23e-41	2.12e-40	1.06e-38	5977.85	3883.95
Metabolism;Carbohydrate Metabolism;Amino sugar and nucleotide sugar metabolism	1.83911e+06	5.55e-41	3.57e-40	1.82e-38	124424	105219
Metabolism;Metabolism of Other Amino Acids;beta-Alanine metabolism	1843898	2.39e-40	1.51e-39	7.85e-38	21695.3	16082.4
Organismal Systems;Immune System;NOD-like receptor signaling pathway	1.86349e+06	8.36e-38	5.17e-37	2.74e-35	3361.16	2995.55
Metabolism;Biosynthesis of Other Secondary Metabolites;Tropane, piperidine and pyridine alkaloid biosynthesis	1.86507e+06	1.33e-37	8.07e-37	4.36e-35	11042.7	9005.9
Metabolism;Glycan Biosynthesis and Metabolism;Lipopolysaccharide biosynthesis proteins	1.86689e+06	2.27e-37	1.35e-36	7.43e-35	42697.3	32667.1
Unclassified;Cellular Processes and Signaling;Germination	1.86824e+06	3.36e-37	1.97e-36	1.1e-34	2009.98	2329.3
Metabolism;Carbohydrate Metabolism;Butanoate metabolism	1872593	1.19e-36	6.84e-36	3.9e-34	65182.2	50356.3
Metabolism;Metabolism of Other Amino Acids;D-Glutamine and D-glutamate metabolism	1876252	3.41e-36	1.93e-35	1.12e-33	12216.8	10520
Metabolism;Amino Acid Metabolism;Phenylalanine metabolism	1.8798e+06	9.43e-36	5.24e-35	3.09e-33	21916.3	16503.7
Human Diseases;Infectious Diseases;Bacterial invasion of epithelial cells	1.88017e+06	1.04e-35	5.71e-35	3.43e-33	326.554	166.181
Organismal Systems;Digestive System;Bile secretion	1.88166e+06	1.35e-35	7.27e-35	4.43e-33	17.9029	36.2491
Metabolism;Xenobiotics Biodegradation and Metabolism;Benzoate degradation	1.8818e+06	1.67e-35	8.81e-35	5.46e-33	27161.8	18866.1
Unclassified;Metabolism;Metabolism of cofactors and vitamins	1.88432e+06	3.41e-35	1.77e-34	1.12e-32	14608.2	11023.4
Human Diseases;Immune System Diseases;Systemic lupus erythematosus	1887163	3.64e-35	1.86e-34	1.19e-32	97.9457	244.883
Unclassified;Cellular Processes and Signaling;Inorganic ion transport and metabolism	1885397	4.62e-35	2.33e-34	1.52e-32	27920.5	20434.3
Genetic Information Processing;Transcription;Transcription factors	1895962	8.89e-34	4.42e-33	2.92e-31	175335	129901
Metabolism;Metabolism of Cofactors and Vitamins;Nicotinate and nicotinamide metabolism	1.89851e+06	1.8e-33	8.81e-33	5.9e-31	36485.4	30692.4
Metabolism;Metabolism of Cofactors and Vitamins;Retinol metabolism	1.89965e+06	2.46e-33	1.19e-32	8.08e-31	4028.38	2941.73
Genetic Information Processing;Folding, Sorting and Degradation;Chaperones and folding catalysts	1.90115e+06	3.71e-33	1.77e-32	1.22e-30	88714.1	76364
Metabolism;Biosynthesis of Other Secondary Metabolites;Flavone and flavonol biosynthesis	1.90467e+06	9.74e-33	4.57e-32	3.2e-30	644.916	510.975
Metabolism;Enzyme Families;Protein kinases	1.90757e+06	2.14e-32	9.89e-32	7.02e-30	31174.3	23548.6
Unclassified;Poorly Characterized;Function unknown	1.90781e+06	2.29e-32	1.04e-31	7.51e-30	137635	106423
Metabolism;Biosynthesis of Other Secondary Metabolites;Isoquinoline alkaloid biosynthesis	1.91016e+06	4.32e-32	1.94e-31	1.42e-29	5911.63	4772.61
Unclassified;Cellular Processes and Signaling;Electron transfer carriers	1910628	4.9e-32	2.17e-31	1.61e-29	5040.77	2776.72
Metabolism;Lipid Metabolism;Fatty acid metabolism	1916332	2.26e-31	9.9e-31	7.42e-29	29320.3	21566.5
Metabolism;Glycan Biosynthesis and Metabolism;N-Glycan biosynthesis	1917846	3.39e-31	1.46e-30	1.11e-28	1453.47	1789.38
Metabolism;Xenobiotics Biodegradation and Metabolism;Aminobenzoate degradation	1.91868e+06	4.23e-31	1.8e-30	1.39e-28	15376	11614.3
Environmental Information Processing;Membrane Transport;ABC transporters	1.91935e+06	5.05e-31	2.12e-30	1.66e-28	323107	244860
Metabolism;Metabolism of Cofactors and Vitamins;Folate biosynthesis	1.92622e+06	3.08e-30	1.28e-29	1.01e-27	33589.3	29014.1
Metabolism;Xenobiotics Biodegradation and Metabolism;Metabolism of xenobiotics by cytochrome P450	1928342	5.37e-30	2.2e-29	1.76e-27	6071.99	3868.13
Metabolism;Lipid Metabolism;alpha-Linolenic acid metabolism	1930667	9.82e-30	3.98e-29	3.22e-27	1681.69	840.232
Metabolism;Carbohydrate Metabolism;C5-Branched dibasic acid metabolism	1932871	1.74e-29	6.95e-29	5.7e-27	26692.5	22019.5
Organismal Systems;Immune System;RIG-I-like receptor signaling pathway	1.9342e+06	2.43e-29	9.62e-29	7.99e-27	94.9611	53.5877
Unclassified;Metabolism;Others	1.93833e+06	7.07e-29	2.76e-28	2.32e-26	93170.1	75757.7
Metabolism;Metabolism of Terpenoids and Polyketides;Tetracycline biosynthesis	1.93912e+06	8.64e-29	3.33e-28	2.83e-26	11115	8966.59
Metabolism;Amino Acid Metabolism;Glycine, serine and threonine metabolism	1.93937e+06	9.2e-29	3.51e-28	3.02e-26	72050.2	60584.9
Metabolism;Xenobiotics Biodegradation and Metabolism;Bisphenol degradation	1943672	2.74e-28	1.03e-27	9e-26	5994.27	5226.06
Metabolism;Metabolism of Cofactors and Vitamins;Riboflavin metabolism	1944813	3.66e-28	1.36e-27	1.2e-25	22161.8	18948.5
Metabolism;Energy Metabolism;Sulfur metabolism	1.94487e+06	3.71e-28	1.37e-27	1.22e-25	25780.9	22065
Environmental Information Processing;Signal Transduction;MAPK signaling pathway - yeast	1.94641e+06	5.47e-28	1.99e-27	1.79e-25	3509.33	2966.26
Environmental Information Processing;Membrane Transport;Transporters	1950942	1.7e-27	6.13e-27	5.58e-25	626016	482577
Metabolism;Energy Metabolism;Carbon fixation pathways in prokaryotes	1.95165e+06	2.03e-27	7.23e-27	6.65e-25	86231.8	74180.5
Metabolism;Biosynthesis of Other Secondary Metabolites;Flavonoid biosynthesis	1952256	2.36e-27	8.31e-27	7.73e-25	546.505	659.215
Unclassified;Metabolism;Biosynthesis and biodegradation of secondary metabolites	1.95296e+06	2.81e-27	9.79e-27	9.21e-25	9314.99	6368.93
Metabolism;Biosynthesis of Other Secondary Metabolites;Caffeine metabolism	1954499	3.02e-27	1.04e-26	9.92e-25	99.513	245.86
Genetic Information Processing;Folding, Sorting and Degradation;Sulfur relay system	1.95461e+06	4.23e-27	1.44e-26	1.39e-24	27374.6	21468.5
Unclassified;Genetic Information Processing;Protein folding and associated processing	1.95503e+06	4.68e-27	1.58e-26	1.54e-24	60000.8	49830.7
Metabolism;Biosynthesis of Other Secondary Metabolites;Novobiocin biosynthesis	1.95526e+06	4.96e-27	1.66e-26	1.63e-24	11688.1	9812.08
Genetic Information Processing;Folding, Sorting and Degradation;Ubiquitin system	1.95674e+06	7.13e-27	2.36e-26	2.34e-24	1385.74	944.019
Metabolism;Biosynthesis of Other Secondary Metabolites;Penicillin and cephalosporin biosynthesis	1.96728e+06	9.28e-26	3.04e-25	3.04e-23	3666.87	2838.2
Metabolism;Carbohydrate Metabolism;Propanoate metabolism	1.96876e+06	1.32e-25	4.3e-25	4.34e-23	51193.1	40792.6
Metabolism;Lipid Metabolism;Fatty acid biosynthesis	1.97225e+06	3.05e-25	9.8e-25	1e-22	39670.2	33432
Organismal Systems;Endocrine System;PPAR signaling pathway	1974638	5.37e-25	1.71e-24	1.76e-22	8894.59	7914.39
Metabolism;Metabolism of Terpenoids and Polyketides;Zeatin biosynthesis	1.97533e+06	6.33e-25	2e-24	2.08e-22	3818.39	3545.82
Metabolism;Metabolism of Other Amino Acids;D-Alanine metabolism	1.98009e+06	1.94e-24	6.07e-24	6.37e-22	8686.08	7353.24
Unclassified;Poorly Characterized;General function prediction only	1.98252e+06	3.43e-24	1.06e-23	1.12e-21	314872	269082
Metabolism;Amino Acid Metabolism;Lysine biosynthesis	1983577	4.38e-24	1.33e-23	1.44e-21	64439.9	55262.3
Metabolism;Metabolism of Terpenoids and Polyketides;Geraniol degradation	1.98359e+06	4.39e-24	1.33e-23	1.44e-21	9861.81	6614.47
Metabolism;Carbohydrate Metabolism;Citrate cycle (TCA cycle)	1987085	9.85e-24	2.96e-23	3.23e-21	58859.5	50031.1
Metabolism;Lipid Metabolism;Linoleic acid metabolism	1.98872e+06	1.43e-23	4.28e-23	4.71e-21	4650.81	4148.84
Metabolism;Amino Acid Metabolism;Valine, leucine and isoleucine degradation	1989201	1.6e-23	4.74e-23	5.26e-21	28425.6	21606.1
Metabolism;Biosynthesis of Other Secondary Metabolites;Phenylpropanoid biosynthesis	1990107	1.97e-23	5.78e-23	6.47e-21	13536.6	11404.9
Environmental Information Processing;Signal Transduction;Two-component system	1990407	2.11e-23	6.13e-23	6.93e-21	152510	119142
Metabolism;Lipid Metabolism;Steroid biosynthesis	1.99455e+06	5.36e-23	1.54e-22	1.76e-20	319.611	752.024
Metabolism;Xenobiotics Biodegradation and Metabolism;Drug metabolism - cytochrome P450	1997171	9.81e-23	2.8e-22	3.22e-20	6398.42	4265.96
Metabolism;Metabolism of Terpenoids and Polyketides;Polyketide sugar unit biosynthesis	1.99879e+06	1.41e-22	3.99e-22	4.63e-20	15471.6	14262.5
Metabolism;Enzyme Families;Peptidases	2001358	2.51e-22	7.03e-22	8.23e-20	160432	137456
Metabolism;Metabolism of Cofactors and Vitamins;Ubiquinone and other terpenoid-quinone biosynthesis	2007084	8.93e-22	2.48e-21	2.93e-19	22254.6	16914
Organismal Systems;Endocrine System;Insulin signaling pathway	2.01001e+06	1.7e-21	4.68e-21	5.57e-19	6878.31	5928.18
Unclassified;Metabolism;Nucleotide metabolism	2.01156e+06	2.38e-21	6.51e-21	7.82e-19	8052.96	5193.93
Metabolism;Amino Acid Metabolism;Arginine and proline metabolism	2012376	2.84e-21	7.71e-21	9.33e-19	105390	89440.3
Metabolism;Carbohydrate Metabolism;Inositol phosphate metabolism	2.01279e+06	3.11e-21	8.36e-21	1.02e-18	12488	9060.86
Unclassified;Metabolism;Energy metabolism	2.01354e+06	3.66e-21	9.76e-21	1.2e-18	79344.8	67610.5
Unclassified;Cellular Processes and Signaling;Cell motility and secretion	2020999	1.82e-20	4.82e-20	5.97e-18	17111.8	15553.4
Metabolism;Xenobiotics Biodegradation and Metabolism;Naphthalene degradation	2023784	3.29e-20	8.64e-20	1.08e-17	13921.7	11338.2
Unclassified;Cellular Processes and Signaling;Signal transduction mechanisms	2.02414e+06	3.55e-20	9.25e-20	1.17e-17	42612.9	35196.9
Metabolism;Metabolism of Other Amino Acids;Selenocompound metabolism	2.02498e+06	4.24e-20	1.09e-19	1.39e-17	33814.1	28589.3
Metabolism;Amino Acid Metabolism;Tyrosine metabolism	2026314	5.61e-20	1.44e-19	1.84e-17	33384.3	26477.4
Metabolism;Amino Acid Metabolism;Lysine degradation	2026759	6.16e-20	1.57e-19	2.02e-17	17964.5	13308.2
Organismal Systems;Digestive System;Carbohydrate digestion and absorption	2.02749e+06	7.19e-20	1.81e-19	2.36e-17	1812.74	1246.97
Metabolism;Lipid Metabolism;Synthesis and degradation of ketone bodies	2.02762e+06	7.39e-20	1.85e-19	2.42e-17	4771.76	3464.24
Metabolism;Glycan Biosynthesis and Metabolism;Lipopolysaccharide biosynthesis	2.02924e+06	1.04e-19	2.57e-19	3.4e-17	27767.8	23104.7
Organismal Systems;Nervous System;Glutamatergic synapse	2030165	1.26e-19	3.1e-19	4.12e-17	7989.62	7247.05
Human Diseases;Cardiovascular Diseases;Hypertrophic cardiomyopathy (HCM)	2.03592e+06	2.34e-19	5.73e-19	7.68e-17	8.92913	5.00341
Metabolism;Glycan Biosynthesis and Metabolism;Other glycan degradation	2.03356e+06	2.55e-19	6.19e-19	8.35e-17	24456.7	21634.5
Cellular Processes;Cell Growth and Death;p53 signaling pathway	2.0338e+06	2.67e-19	6.43e-19	8.75e-17	134.048	81.1775
Human Diseases;Infectious Diseases;Toxoplasmosis	2.03476e+06	3.25e-19	7.69e-19	1.07e-16	133.024	80.6853
Human Diseases;Cancers;Small cell lung cancer	2034768	3.25e-19	7.69e-19	1.07e-16	133.028	80.7092
Human Diseases;Cardiovascular Diseases;Viral myocarditis	2034803	3.28e-19	7.69e-19	1.08e-16	133.023	80.6853
Human Diseases;Cancers;Colorectal cancer	2.03481e+06	3.28e-19	7.69e-19	1.08e-16	133.021	80.6846
Metabolism;Carbohydrate Metabolism;Pyruvate metabolism	2.03573e+06	3.98e-19	9.26e-19	1.31e-16	95141.9	79087
Organismal Systems;Environmental Adaptation;Circadian rhythm - plant	2036567	4.69e-19	1.08e-18	1.54e-16	160.297	287.42
Metabolism;Carbohydrate Metabolism;Pentose phosphate pathway	2.04041e+06	1.04e-18	2.38e-18	3.4e-16	77026.4	65236.5
Human Diseases;Cancers;Pathways in cancer	2.04804e+06	4.81e-18	1.1e-17	1.58e-15	4199.48	3706.63
Organismal Systems;Endocrine System;Renin-angiotensin system	2.05194e+06	8.42e-18	1.9e-17	2.76e-15	12.7319	7.41365
Environmental Information Processing;Signal Transduction;Phosphatidylinositol signaling system	2.05223e+06	1.11e-17	2.48e-17	3.63e-15	7620.93	6768.5
Metabolism;Xenobiotics Biodegradation and Metabolism;Ethylbenzene degradation	2055626	2.15e-17	4.8e-17	7.06e-15	4063.18	3373.2
Metabolism;Lipid Metabolism;Glycerolipid metabolism	2059441	4.52e-17	1e-16	1.48e-14	35239	28804
Metabolism;Amino Acid Metabolism;Cysteine and methionine metabolism	2060347	5.38e-17	1.18e-16	1.77e-14	82757	70200.3
Metabolism;Amino Acid Metabolism;Phenylalanine, tyrosine and tryptophan biosynthesis	2063609	1.01e-16	2.2e-16	3.3e-14	66159.1	57484.1
Metabolism;Biosynthesis of Other Secondary Metabolites;Streptomycin biosynthesis	2067179	1.99e-16	4.32e-16	6.52e-14	26013.7	23536.2
Metabolism;Xenobiotics Biodegradation and Metabolism;Caprolactam degradation	2070867	3.99e-16	8.61e-16	1.31e-13	6770.19	4340.93
Metabolism;Amino Acid Metabolism;Histidine metabolism	2.07312e+06	6.08e-16	1.3e-15	1.99e-13	48577	43405.3
Metabolism;Energy Metabolism;Oxidative phosphorylation	2074166	7.39e-16	1.57e-15	2.42e-13	91949.7	81408.9
Genetic Information Processing;Transcription;RNA polymerase	2.078e+06	1.5e-15	3.18e-15	4.92e-13	11788.4	11962.7
Metabolism;Lipid Metabolism;Lipid biosynthesis proteins	2080268	2.28e-15	4.79e-15	7.47e-13	51524.2	44910.4
Unclassified;Genetic Information Processing;Replication, recombination and repair proteins	2081141	2.67e-15	5.58e-15	8.76e-13	73248.9	62484.1
Metabolism;Metabolism of Terpenoids and Polyketides;Biosynthesis of ansamycins	2083448	4.06e-15	8.43e-15	1.33e-12	10741.4	8633.63
Metabolism;Xenobiotics Biodegradation and Metabolism;Nitrotoluene degradation	2.08735e+06	8.21e-15	1.69e-14	2.69e-12	7804.2	6134.91
Metabolism;Lipid Metabolism;Sphingolipid metabolism	2092170	1.94e-14	3.97e-14	6.35e-12	18038.3	16478.9
Human Diseases;Infectious Diseases;Shigellosis	2092560	2.01e-14	4.1e-14	6.61e-12	268.81	139.88
Metabolism;Metabolism of Terpenoids and Polyketides;Limonene and pinene degradation	2.09387e+06	2.61e-14	5.29e-14	8.58e-12	11790.5	8902.22
Environmental Information Processing;Signaling Molecules and Interaction;Ion channels	2.09471e+06	3.03e-14	6.1e-14	9.94e-12	1870.75	1491.05
Organismal Systems;Endocrine System;Progesterone-mediated oocyte maturation	2099430	6.9e-14	1.37e-13	2.26e-11	3153.85	2877.03
Organismal Systems;Immune System;Antigen processing and presentation	2099430	6.9e-14	1.37e-13	2.26e-11	3153.85	2877.03
Human Diseases;Infectious Diseases;Pathogenic Escherichia coli infection	2.10009e+06	7.51e-14	1.48e-13	2.46e-11	669.725	349.369
Metabolism;Metabolism of Cofactors and Vitamins;Pantothenate and CoA biosynthesis	2099932	7.53e-14	1.48e-13	2.47e-11	50750.8	44723.3
Metabolism;Xenobiotics Biodegradation and Metabolism;1,1,1-Trichloro-2,2-bis(4-chlorophenyl)ethane (DDT) degradation	2100100	7.73e-14	1.51e-13	2.54e-11	180.405	114.435
Metabolism;Glycan Biosynthesis and Metabolism;Peptidoglycan biosynthesis	2.10424e+06	1.58e-13	3.06e-13	5.17e-11	63462.7	56148.1
Metabolism;Amino Acid Metabolism;Tryptophan metabolism	2112103	5.95e-13	1.15e-12	1.95e-10	21782.2	15676.9
Metabolism;Xenobiotics Biodegradation and Metabolism;Styrene degradation	2112218	6.06e-13	1.16e-12	1.99e-10	3418.52	2314.96
Environmental Information Processing;Membrane Transport;Secretion system	2115466	1.04e-12	1.98e-12	3.41e-10	127767	100985
Cellular Processes;Transport and Catabolism;Endocytosis	2120967	1.52e-12	2.85e-12	5e-10	2.54463	1.75836
Organismal Systems;Endocrine System;GnRH signaling pathway	2120967	1.52e-12	2.85e-12	5e-10	2.54463	1.75836
Organismal Systems;Immune System;Fc gamma R-mediated phagocytosis	2120967	1.52e-12	2.85e-12	5e-10	2.54463	1.75836
Metabolism;Xenobiotics Biodegradation and Metabolism;Chloroalkane and chloroalkene degradation	2121335	2.71e-12	5.05e-12	8.9e-10	16183.2	13267.5
Metabolism;Energy Metabolism;Carbon fixation in photosynthetic organisms	2.12281e+06	3.44e-12	6.38e-12	1.13e-09	55196.1	47912.8
Metabolism;Metabolism of Terpenoids and Polyketides;Biosynthesis of type II polyketide products	2.12434e+06	3.71e-12	6.84e-12	1.22e-09	1.14144	0.549488
Metabolism;Nucleotide Metabolism;Purine metabolism	2.12342e+06	3.8e-12	6.96e-12	1.25e-09	182092	161277
Metabolism;Xenobiotics Biodegradation and Metabolism;Chlorocyclohexane and chlorobenzene degradation	2125700	5.47e-12	9.98e-12	1.8e-09	2476.58	1824.5
Environmental Information Processing;Membrane Transport;Bacterial secretion system	2128681	8.8e-12	1.59e-11	2.89e-09	64399.7	52140.2
Human Diseases;Neurodegenerative Diseases;Parkinson's disease	2.13373e+06	1.94e-11	3.5e-11	6.38e-09	514.674	329.386
Genetic Information Processing;Replication and Repair;Chromosome	2.14044e+06	5.46e-11	9.79e-11	1.79e-08	127246	112888
Metabolism;Xenobiotics Biodegradation and Metabolism;Drug metabolism - other enzymes	2.14728e+06	1.53e-10	2.73e-10	5.02e-08	25720.5	23075.3
Unclassified;Metabolism;Lipid metabolism	2.14754e+06	1.59e-10	2.82e-10	5.22e-08	13536.8	10961.3
Metabolism;Metabolism of Cofactors and Vitamins;Lipoic acid metabolism	2.14909e+06	2e-10	3.53e-10	6.57e-08	3955.78	3326.41
Human Diseases;Cancers;Prostate cancer	2153491	3.82e-10	6.71e-10	1.25e-07	3317.4	3081.34
Metabolism;Enzyme Families;Cytochrome P450	2.15918e+06	7.77e-10	1.35e-09	2.55e-07	0.616707	0.31058
Metabolism;Lipid Metabolism;Ether lipid metabolism	2161765	1.26e-09	2.18e-09	4.12e-07	304.589	214.207
Genetic Information Processing;Translation;Ribosome	2.16365e+06	1.64e-09	2.83e-09	5.37e-07	171877	170970
Cellular Processes;Cell Growth and Death;Meiosis - yeast	2165272	2.06e-09	3.53e-09	6.74e-07	551.007	735.803
Human Diseases;Infectious Diseases;Epithelial cell signaling in Helicobacter pylori infection	2.17248e+06	5.56e-09	9.5e-09	1.82e-06	7119.53	6219.71
Organismal Systems;Circulatory System;Cardiac muscle contraction	2.17544e+06	8.3e-09	1.41e-08	2.72e-06	380.714	248.452
Organismal Systems;Excretory System;Proximal tubule bicarbonate reclamation	2176945	1.02e-08	1.72e-08	3.33e-06	2995.09	2562.47
Metabolism;Metabolism of Terpenoids and Polyketides;Terpenoid backbone biosynthesis	2179779	1.48e-08	2.49e-08	4.86e-06	43149.4	39506.8
Metabolism;Carbohydrate Metabolism;Glycolysis / Gluconeogenesis	2.18039e+06	1.61e-08	2.69e-08	5.27e-06	100862	86719.9
Human Diseases;Neurodegenerative Diseases;Huntington's disease	2182077	2.01e-08	3.34e-08	6.58e-06	3914.86	3141.09
Genetic Information Processing;Replication and Repair;Non-homologous end-joining	2.18294e+06	2.25e-08	3.73e-08	7.38e-06	1227.4	1441.07
Organismal Systems;Endocrine System;Adipocytokine signaling pathway	2.18661e+06	3.62e-08	5.97e-08	1.19e-05	4909.42	4715.6
Organismal Systems;Environmental Adaptation;Plant-pathogen interaction	2187022	3.82e-08	6.27e-08	1.25e-05	12216.1	10930.6
Metabolism;Metabolism of Terpenoids and Polyketides;Biosynthesis of vancomycin group antibiotics	2.18829e+06	4.5e-08	7.34e-08	1.47e-05	4662.36	4478.95
Metabolism;Metabolism of Cofactors and Vitamins;Thiamine metabolism	2191280	6.58e-08	1.07e-07	2.16e-05	39977.4	35722.7
Metabolism;Biosynthesis of Other Secondary Metabolites;Betalain biosynthesis	2.19141e+06	6.6e-08	1.07e-07	2.17e-05	53.5341	34.4567
Metabolism;Lipid Metabolism;Biosynthesis of unsaturated fatty acids	2.19173e+06	6.97e-08	1.12e-07	2.29e-05	15140.6	12503.1
Metabolism;Amino Acid Metabolism;Valine, leucine and isoleucine biosynthesis	2.19334e+06	8.54e-08	1.37e-07	2.8e-05	59188.4	52724.4
Metabolism;Biosynthesis of Other Secondary Metabolites;Indole alkaloid biosynthesis	2202634	2.31e-07	3.67e-07	7.56e-05	1.34499	0.833447
Genetic Information Processing;Folding, Sorting and Degradation;Proteasome	2.20273e+06	2.72e-07	4.31e-07	8.92e-05	3216.17	2982.91
Organismal Systems;Endocrine System;Melanogenesis	2202973	2.75e-07	4.34e-07	9.03e-05	52.1529	33.6034
Metabolism;Lipid Metabolism;Glycerophospholipid metabolism	2.20426e+06	3.27e-07	5.13e-07	0.000107263	49582.4	43521.8
Metabolism;Metabolism of Other Amino Acids;D-Arginine and D-ornithine metabolism	2.20528e+06	3.69e-07	5.77e-07	0.000121173	303.213	242.244
Metabolism;Metabolism of Terpenoids and Polyketides;Carotenoid biosynthesis	2.20596e+06	4.01e-07	6.23e-07	0.000131506	653.549	663.21
Metabolism;Metabolism of Other Amino Acids;Taurine and hypotaurine metabolism	2212465	8.62e-07	1.33e-06	0.000282854	9591.66	8637.63
Metabolism;Xenobiotics Biodegradation and Metabolism;Atrazine degradation	2219325	1.89e-06	2.91e-06	0.000620102	2905.5	2780.8
Metabolism;Glycan Biosynthesis and Metabolism;Glycosphingolipid biosynthesis - globo series	2.22146e+06	2.4e-06	3.68e-06	0.000788051	9134.42	8676.05
Metabolism;Xenobiotics Biodegradation and Metabolism;Fluorobenzoate degradation	2223407	2.98e-06	4.55e-06	0.000978316	2186.78	1526.19
Environmental Information Processing;Signaling Molecules and Interaction;Bacterial toxins	2.22593e+06	3.94e-06	5.98e-06	0.00129206	8802.44	8198.33
Metabolism;Metabolism of Terpenoids and Polyketides;Biosynthesis of type II polyketide backbone	2233940	7.03e-06	1.06e-05	0.00230632	3.4807	1.69556
Genetic Information Processing;Translation;Aminoacyl-tRNA biosynthesis	2.23472e+06	1.01e-05	1.52e-05	0.00331606	86997.4	85795.2
Metabolism;Metabolism of Terpenoids and Polyketides;Biosynthesis of 12-, 14- and 16-membered macrolides	2241331	1.85e-05	2.77e-05	0.00607622	0.788601	0.447099
Human Diseases;Infectious Diseases;Staphylococcus aureus infection	2241083	1.95e-05	2.91e-05	0.00640368	1407.32	900.51
Metabolism;Energy Metabolism;Methane metabolism	2244288	2.7e-05	4.01e-05	0.00885484	98206.5	87274.5
Cellular Processes;Cell Growth and Death;Cell cycle - Caulobacter	2246409	3.34e-05	4.93e-05	0.0109424	37757.2	34911.1
Unclassified;Genetic Information Processing;Transcription related proteins	2248229	3.99e-05	5.87e-05	0.0130986	1916.95	1271.35
Human Diseases;Metabolic Diseases;Type II diabetes mellitus	2256450	8.82e-05	0.000129118	0.0289225	4138.45	3717.7
Metabolism;Xenobiotics Biodegradation and Metabolism;Polycyclic aromatic hydrocarbon degradation	2256683	9.01e-05	0.000131399	0.0295649	8276.62	7706.48
Human Diseases;Infectious Diseases;Chagas disease (American trypanosomiasis)	2.25962e+06	0.000118632	0.000172173	0.0389112	639.437	492.542
Unclassified;Genetic Information Processing;Translation proteins	2259934	0.000122122	0.000176459	0.0400561	75189.8	67640.7
Metabolism;Metabolism of Cofactors and Vitamins;One carbon pool by folate	2262247	0.000151099	0.00021737	0.0495605	48726.4	45318
Metabolism;Glycan Biosynthesis and Metabolism;Glycosphingolipid biosynthesis - lacto and neolacto series	2266931	0.000189084	0.000270827	0.0620194	8.99548	8.30785
Metabolism;Lipid Metabolism;Primary bile acid biosynthesis	2.26794e+06	0.000252268	0.000359756	0.082744	2242.02	2086.33
Genetic Information Processing;Translation;Translation factors	2.27088e+06	0.000326849	0.000464097	0.107206	40318.4	38977
Metabolism;Lipid Metabolism;Arachidonic acid metabolism	2277253	0.000564333	0.00079785	0.185101	3919.22	3211.52
Genetic Information Processing;Replication and Repair;Nucleotide excision repair	2.27982e+06	0.000699142	0.0009842	0.229319	28829.8	28374.5
Human Diseases;Cancers;Renal cell carcinoma	2.28e+06	0.000709526	0.000994549	0.232725	912.589	748.878
Metabolism;Metabolism of Terpenoids and Polyketides;Prenyltransferases	2.28526e+06	0.00108998	0.00152134	0.357515	24054.3	22853.3
Environmental Information Processing;Signaling Molecules and Interaction;Cytokine receptors	2.28876e+06	0.0012484	0.00172775	0.409476	0.457479	0.213652
Environmental Information Processing;Signaling Molecules and Interaction;Cytokine-cytokine receptor interaction	2.28876e+06	0.0012484	0.00172775	0.409476	0.457479	0.213652
Metabolism;Biosynthesis of Other Secondary Metabolites;Stilbenoid, diarylheptanoid and gingerol biosynthesis	2291981	0.00184899	0.00254818	0.606467	317.779	240.231
Metabolism;Biosynthesis of Other Secondary Metabolites;Butirosin and neomycin biosynthesis	2294466	0.00223575	0.00306831	0.733326	5161.25	5244.92
Genetic Information Processing;Replication and Repair;DNA replication	2.29592e+06	0.00249516	0.00341005	0.818413	49889.1	48028.9
Genetic Information Processing;Replication and Repair;DNA replication proteins	2.29886e+06	0.00310471	0.0042255	1	93417.7	89841.3
Unclassified;Cellular Processes and Signaling;Sporulation	2.30305e+06	0.0042117	0.00570842	1	45118.4	43223.8
Genetic Information Processing;Translation;RNA transport	2.30489e+06	0.00480252	0.00648241	1	10631.3	9538
Genetic Information Processing;Folding, Sorting and Degradation;Protein export	2.31195e+06	0.00782285	0.010516	1	45925.2	42540.5
Genetic Information Processing;Folding, Sorting and Degradation;RNA degradation	2.31301e+06	0.00840004	0.0112458	1	37026.3	34649.2
Metabolism;Lipid Metabolism;Secondary bile acid biosynthesis	2313264	0.00854487	0.0113932	1	2170.74	2045.36
Genetic Information Processing;Translation;Ribosome Biogenesis	2.31723e+06	0.0110988	0.0147385	1	114078	103616
Genetic Information Processing;Replication and Repair;DNA repair and recombination proteins	2326981	0.02045	0.0270468	1	222674	204441
Metabolism;Glycan Biosynthesis and Metabolism;Glycosaminoglycan degradation	2.33104e+06	0.0260267	0.0342841	1	6678.43	7028.37
Genetic Information Processing;Translation;Ribosome biogenesis in eukaryotes	2334197	0.0312415	0.0409889	1	4076.16	3864.68
Metabolism;Biosynthesis of Other Secondary Metabolites;Isoflavonoid biosynthesis	2.34098e+06	0.0427897	0.0559164	1	0.17883	0.0948805
Metabolism;Energy Metabolism;Photosynthesis proteins	2340687	0.0448053	0.058318	1	28781.3	27161.6
Metabolism;Glycan Biosynthesis and Metabolism;Glycosphingolipid biosynthesis - ganglio series	2.34084e+06	0.0451687	0.0585586	1	4365.75	4372.88
Metabolism;Amino Acid Metabolism;Amino acid related enzymes	2.34807e+06	0.0659609	0.0851779	1	117343	108146
Organismal Systems;Immune System;Hematopoietic cell lineage	2.3527e+06	0.082912	0.106648	1	0.0826297	0.0395904
Cellular Processes;Cell Motility;Cytoskeleton proteins	2.35394e+06	0.0881556	0.112949	1	26069.1	24678.2
Metabolism;Nucleotide Metabolism;Pyrimidine metabolism	2.3552e+06	0.0936131	0.119475	1	141584	131165
Genetic Information Processing;Replication and Repair;Base excision repair	2.36102e+06	0.122495	0.15573	1	35110.4	32452
Environmental Information Processing;Signaling Molecules and Interaction;G protein-coupled receptors	2.36757e+06	0.158249	0.200408	1	6.04584	3.5058
Genetic Information Processing;Folding, Sorting and Degradation;Protein processing in endoplasmic reticulum	2.36766e+06	0.163498	0.206259	1	5201.96	5178.73
Cellular Processes;Cell Growth and Death;Apoptosis	2368714	0.170846	0.214704	1	262.14	198.654
Metabolism;Energy Metabolism;Photosynthesis	2.37321e+06	0.205045	0.256697	1	27993.9	26717.9
Cellular Processes;Transport and Catabolism;Lysosome	2.37707e+06	0.238168	0.29703	1	9756.89	10067.4
Human Diseases;Neurodegenerative Diseases;Alzheimer's disease	2377653	0.243486	0.302513	1	4887.63	4350.56
Metabolism;Biosynthesis of Other Secondary Metabolites;Clavulanic acid biosynthesis	2382039	0.27892	0.345229	1	0.0772014	0.0430034
Genetic Information Processing;Transcription;Transcription machinery	2.3843e+06	0.309973	0.382222	1	73392	72849.2
Human Diseases;Infectious Diseases;African trypanosomiasis	2385041	0.318083	0.390754	1	658.81	533.349
Human Diseases;Infectious Diseases;Influenza A	2385486	0.322997	0.39531	1	133.782	106.801
Organismal Systems;Excretory System;Aldosterone-regulated sodium reabsorption	2.38808e+06	0.352489	0.429801	1	0.0802171	0.0464164
Organismal Systems;Digestive System;Protein digestion and absorption	2.39525e+06	0.443501	0.538771	1	1545.25	1437.19
Human Diseases;Infectious Diseases;Tuberculosis	2.3967e+06	0.463324	0.560776	1	11548.6	11238.8
Genetic Information Processing;Replication and Repair;Mismatch repair	2401960	0.539301	0.650334	1	61747.1	57769.2
Cellular Processes;Cell Motility;Bacterial chemotaxis	2.40532e+06	0.590849	0.709884	1	31555.1	30127.7
Organismal Systems;Excretory System;Vasopressin-regulated water reabsorption	2405926	0.598049	0.715913	1	0.0989144	0.047099
Metabolism;Glycan Biosynthesis and Metabolism;Glycosaminoglycan biosynthesis - chondroitin sulfate	2406450	0.602241	0.718309	1	0.0162847	0.000682594
Genetic Information Processing;Replication and Repair;Homologous recombination	2.40654e+06	0.6102	0.725166	1	70607.8	66220.4
Metabolism;Lipid Metabolism;Steroid hormone biosynthesis	2.4122e+06	0.703077	0.832524	1	2406.3	2687.92
Cellular Processes;Cell Motility;Flagellar assembly	2.4137e+06	0.728635	0.859685	1	28939.9	26705
Metabolism;Metabolism of Terpenoids and Polyketides;Sesquiterpenoid biosynthesis	2416067	0.76618	0.900742	1	0.0168878	0.00955631
Cellular Processes;Cell Motility;Bacterial motility proteins	2.41613e+06	0.77035	0.90241	1	74549.8	69506.6
Unclassified;Genetic Information Processing;Restriction enzyme	2421701	0.868788	0.999991	1	15392.3	14819.3
Organismal Systems;Digestive System;Pancreatic secretion	2.42353e+06	0.901624	0.999991	1	0.00723764	0.00409556
Metabolism;Energy Metabolism;Photosynthesis - antenna proteins	2.42355e+06	0.901856	0.999991	1	112.755	73.3966
Environmental Information Processing;Signaling Molecules and Interaction;Glycan bindng proteins	2424128	0.912325	0.999991	1	0.146261	0.0122867
Organismal Systems;Immune System;Cytosolic DNA-sensing pathway	2.4248e+06	0.924443	0.999991	1	0.0102533	0.00614334
Cellular Processes;Cell Communication;Focal adhesion	2.4252e+06	0.931681	0.999991	1	0.0126659	0.0136519
Organismal Systems;Digestive System;Gastric acid secretion	2426040	0.946514	0.999991	1	0.00211098	0
Organismal Systems;Digestive System;Salivary secretion	2426040	0.946514	0.999991	1	0.00211098	0
Organismal Systems;Excretory System;Endocrine and other factor-regulated calcium reabsorption	2426040	0.946514	0.999991	1	0.00211098	0
Environmental Information Processing;Signal Transduction;Notch signaling pathway	2426278	0.950251	0.999991	1	0.00965018	0.0156997
Environmental Information Processing;Signal Transduction;Wnt signaling pathway	2426278	0.950251	0.999991	1	0.00965018	0.0156997
Human Diseases;Cancers;Chronic myeloid leukemia	2426278	0.950251	0.999991	1	0.00965018	0.0156997
Environmental Information Processing;Signal Transduction;VEGF signaling pathway	2426272	0.950991	0.999991	1	0.0075392	0.0177474
Human Diseases;Infectious Diseases;Leishmaniasis	2426272	0.950991	0.999991	1	0.0075392	0.0177474
Environmental Information Processing;Signaling Molecules and Interaction;Neuroactive ligand-receptor interaction	2.42647e+06	0.954546	0.999991	1	0.00512666	0.00409556
Environmental Information Processing;Signaling Molecules and Interaction;CAM ligands	2426471	0.954645	0.999991	1	0.0102533	0.0129693
Environmental Information Processing;Signaling Molecules and Interaction;ECM-receptor interaction	2426471	0.954645	0.999991	1	0.0102533	0.0129693
Environmental Information Processing;Signal Transduction;Calcium signaling pathway	2.42669e+06	0.958444	0.999991	1	6.62545	4.31604
Metabolism;Glycan Biosynthesis and Metabolism;Glycosylphosphatidylinositol(GPI)-anchor biosynthesis	2426966	0.963429	0.999991	1	0.00301568	0.00136519
Cellular Processes;Cell Communication;Adherens junction	2.4277e+06	0.976769	0.999991	1	0.00241254	0.000682594
Cellular Processes;Cell Communication;Tight junction	2.4277e+06	0.976769	0.999991	1	0.00241254	0.000682594
Cellular Processes;Cell Motility;Regulation of actin cytoskeleton	2.4277e+06	0.976769	0.999991	1	0.00241254	0.000682594
Human Diseases;Cardiovascular Diseases;Arrhythmogenic right ventricular cardiomyopathy (ARVC)	2.4277e+06	0.976769	0.999991	1	0.00241254	0.000682594
Human Diseases;Cardiovascular Diseases;Dilated cardiomyopathy (DCM)	2.4277e+06	0.976769	0.999991	1	0.00241254	0.000682594
Organismal Systems;Immune System;Leukocyte transendothelial migration	2.4277e+06	0.976769	0.999991	1	0.00241254	0.000682594
Organismal Systems;Sensory System;Phototransduction - fly	2.4277e+06	0.976769	0.999991	1	0.00241254	0.000682594
Cellular Processes;Cell Growth and Death;Cell cycle - yeast	2428970	0.999991	0.999991	1	0	0
Cellular Processes;Cell Growth and Death;Oocyte meiosis	2428970	0.999991	0.999991	1	0	0
Environmental Information Processing;Signal Transduction;ErbB signaling pathway	2428970	0.999991	0.999991	1	0	0
Environmental Information Processing;Signal Transduction;Hedgehog signaling pathway	2428970	0.999991	0.999991	1	0	0
Environmental Information Processing;Signal Transduction;MAPK signaling pathway	2428970	0.999991	0.999991	1	0	0
Environmental Information Processing;Signal Transduction;TGF-beta signaling pathway	2428970	0.999991	0.999991	1	0	0
Environmental Information Processing;Signaling Molecules and Interaction;GTP-binding proteins	2428970	0.999991	0.999991	1	0	0
Genetic Information Processing;Transcription;Spliceosome	2428970	0.999991	0.999991	1	0	0
Human Diseases;Cancers;Glioma	2428970	0.999991	0.999991	1	0	0
Human Diseases;Cancers;Pancreatic cancer	2428970	0.999991	0.999991	1	0	0
Human Diseases;Immune System Diseases;Rheumatoid arthritis	2428970	0.999991	0.999991	1	0	0
Metabolism;Glycan Biosynthesis and Metabolism;Other types of O-glycan biosynthesis	2428970	0.999991	0.999991	1	0	0
Organismal Systems;Circulatory System;Vascular smooth muscle contraction	2428970	0.999991	0.999991	1	0	0
Organismal Systems;Digestive System;Fat digestion and absorption	2428970	0.999991	0.999991	1	0	0
Organismal Systems;Immune System;Complement and coagulation cascades	2428970	0.999991	0.999991	1	0	0
Organismal Systems;Immune System;Fc epsilon RI signaling pathway	2428970	0.999991	0.999991	1	0	0
Organismal Systems;Nervous System;Cholinergic synapse	2428970	0.999991	0.999991	1	0	0
Organismal Systems;Nervous System;Long-term depression	2428970	0.999991	0.999991	1	0	0
Organismal Systems;Nervous System;Long-term potentiation	2428970	0.999991	0.999991	1	0	0
Organismal Systems;Nervous System;Neurotrophin signaling pathway	2428970	0.999991	0.999991	1	0	0
Organismal Systems;Sensory System;Olfactory transduction	2428970	0.999991	0.999991	1	0	0
Organismal Systems;Sensory System;Phototransduction	2428970	0.999991	0.999991	1	0	0
